# Supplementary material for: Determination of vitamin D metabolites in various biological samples through an improved chemical derivatization assisted liquid chromatography-tandem mass spectrometry approach
Source: Royal Society of Chemistry journal article supplement (doi:10.1039/d3ay01769a), 2023-01-01
Supplement: d3ay01769a1.pdf [file d3ay01769a1.pdf]

## Supporting information

for

### **Determination of vitamin D metabolites in various biological samples through an improved chemical derivatization assisted liquid chromatography-tandem mass spectrometry**

Qin-Feng Zhang <sup>ac</sup>, Hua-Ming Xiao <sup>a</sup>, Na An <sup>a</sup>, Quan-Fei Zhu <sup>\*b</sup>, Yu-Qi Feng <sup>\*ab</sup>

<sup>a</sup> *Department of Chemistry, Wuhan University, Wuhan 430072, PR China*

<sup>b</sup> *School of Public Health, Wuhan University, Wuhan 430071, PR China*

<sup>c</sup> *Hubei Geological Research Laboratory, Wuhan 430034, PR China*

\* Corresponding authors:

Quan-Fei Zhu. *E-mail address:* qf\_zhu@whu.edu.cn

Yu-Qi Feng. *E-mail address:* yqfeng@whu.edu.cn

The Supporting information includes following items:

|          |                                                                                                      |
|----------|------------------------------------------------------------------------------------------------------|
| Page S3  | Fig. S1. The chemical structures of 7 VDs.                                                           |
| Page S4  | Fig. S2. Stability of PTAD derivatives under 4 °C for 24 h.                                          |
| Page S5  | Fig. S3. MS/MS spectra of 7 VDs after PTAD derivatization.                                           |
| Page S6  | Table S1. MRM transition parameters of PTAD-derived VDs.                                             |
| Page S7  | Table S2. PTAD derivatization efficiency of 7 VDs in standard solution and three biological samples. |
| Page S8  | Table S3. LOD, LOQ, linear dynamic range and regression curve of PTAD-derived VDs.                   |
| Page S9  | Table S4. Precisions (intra- and inter-day) and recoveries.                                          |
| Page S10 | Table S5. Extraction efficiency and matrix effect.                                                   |

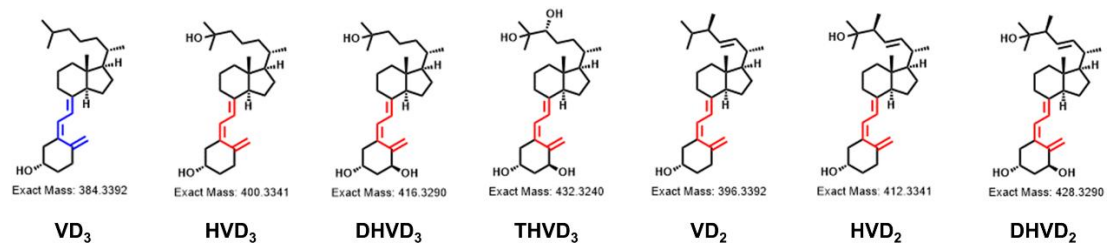

**Fig. S1.** The chemical structures of 7 VD metabolites.

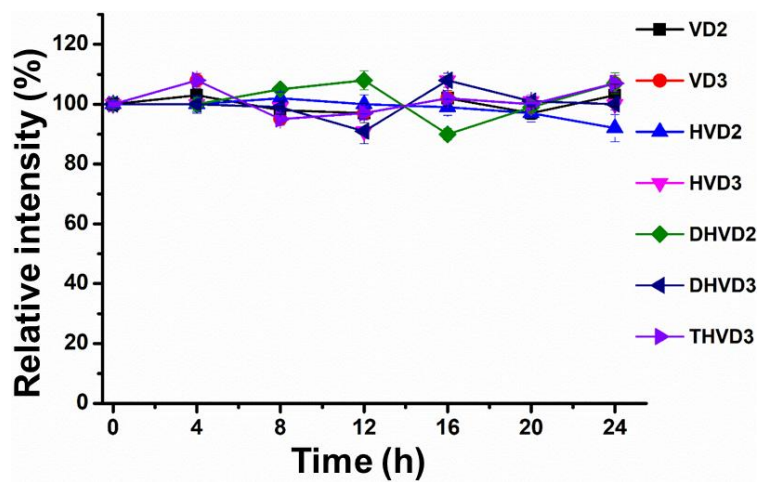

Fig. S2. Stability of 7 PTAD derivatives under 4 °C for 24 h.

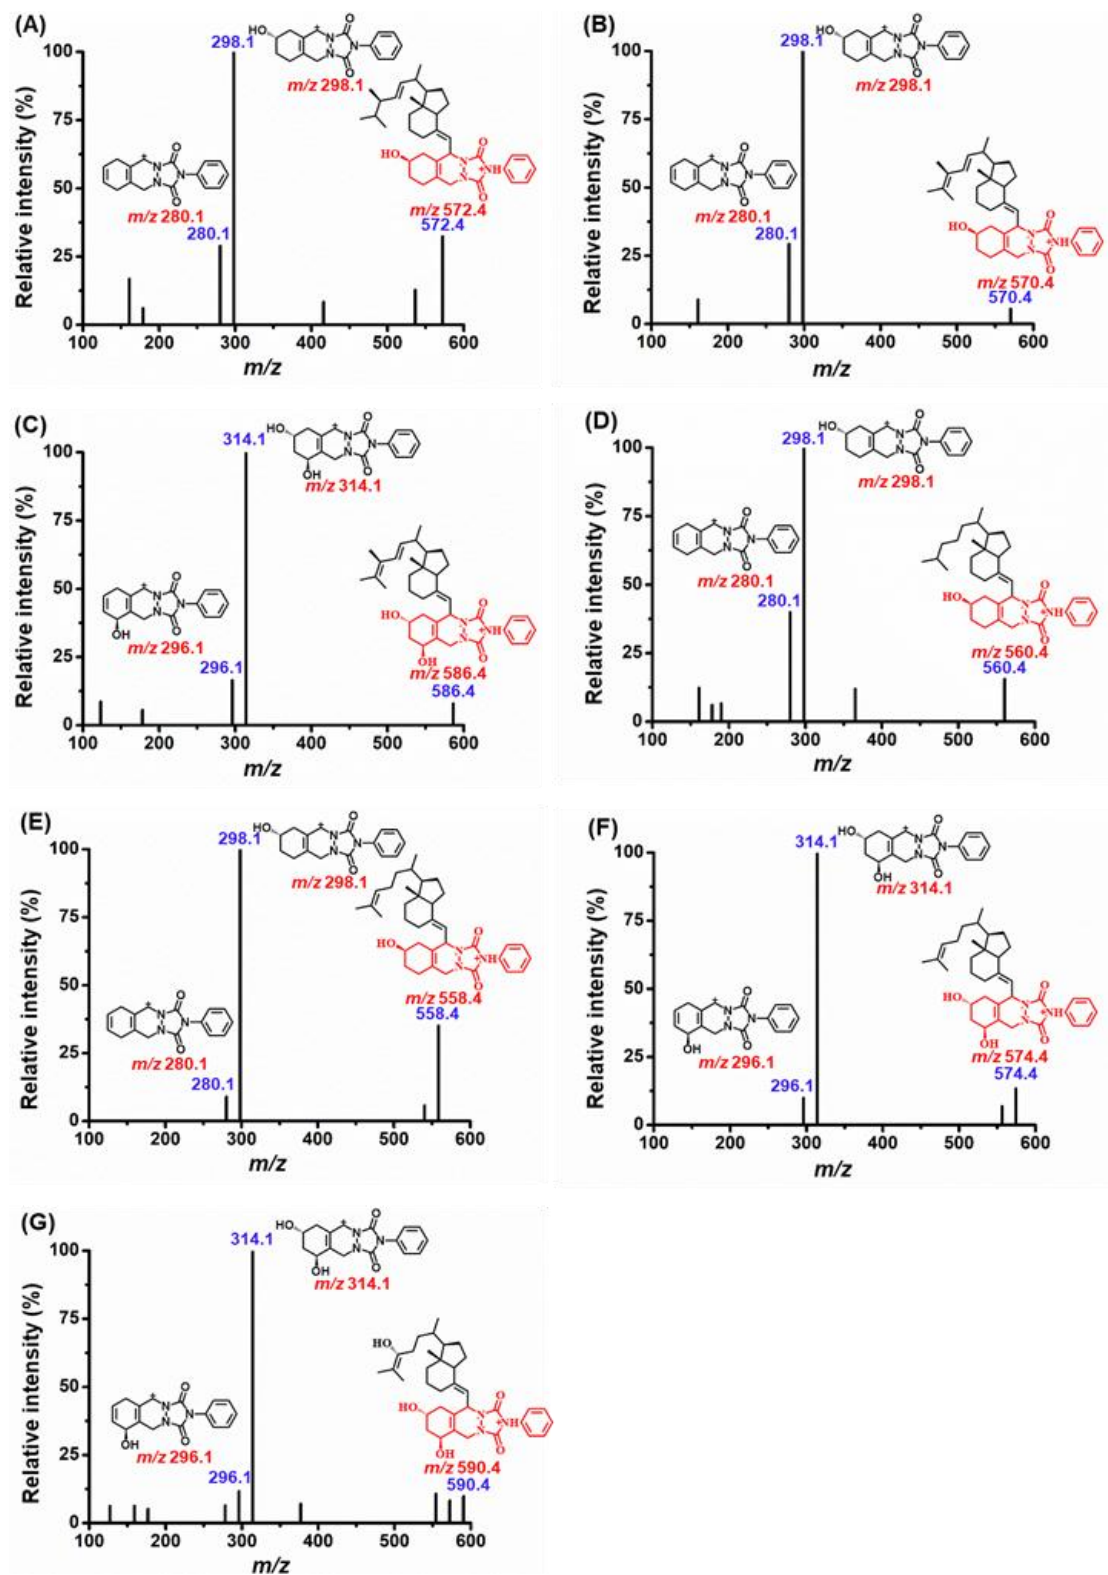

**Fig. S3.** MS/MS spectra of 7 VD metabolites after PTAD derivatization. (a) VD<sub>2</sub>. (b) VD<sub>2</sub>. (c) DHVD<sub>2</sub>. (d) VD<sub>3</sub>. (e) HVD<sub>3</sub>. (f) DHVD<sub>3</sub>. (g) THVD<sub>3</sub>.

**Table S1.** MRM transition parameters of PTAD-derived VDs.

| Analytes                          | Scan mode | Precursor ion ( <i>m/z</i> ) | Product ion ( <i>m/z</i> ) | Dwell Time (msec) | Q1 Pre Bias (V) | CE | Q3 Pre Bias (V) |
|-----------------------------------|-----------|------------------------------|----------------------------|-------------------|-----------------|----|-----------------|
| VD <sub>2</sub>                   | +         | 572.3                        | <b>298.1</b>               | 50                | -26             | 19 | -30             |
|                                   |           |                              | 280.1                      | 50                | -26             | 29 | -29             |
| HVD <sub>2</sub>                  | +         | 570.3                        | <b>298.1</b>               | 50                | -28             | 18 | -30             |
|                                   |           |                              | 280.1                      | 50                | -26             | 30 | -29             |
| DHVD <sub>2</sub>                 | +         | 586.3                        | <b>314.1</b>               | 50                | -26             | 21 | -14             |
|                                   |           |                              | 296.1                      | 50                | -26             | 31 | -30             |
| VD <sub>3</sub>                   | +         | 560.3                        | <b>298.1</b>               | 50                | -20             | 18 | -20             |
|                                   |           |                              | 280.1                      | 50                | -26             | 30 | -29             |
| HVD <sub>3</sub>                  | +         | 558.3                        | <b>298.1</b>               | 50                | -26             | 16 | -20             |
|                                   |           |                              | 280.1                      | 50                | -26             | 28 | -29             |
| DHVD <sub>3</sub>                 | +         | 574.3                        | <b>314.1</b>               | 50                | -20             | 18 | -14             |
|                                   |           |                              | 296.1                      | 50                | -20             | 28 | -19             |
| THVD <sub>3</sub>                 | +         | 590.3                        | <b>314.1</b>               | 50                | -28             | 23 | -14             |
|                                   |           |                              | 296.1                      | 50                | -26             | 30 | -30             |
| VD <sub>2</sub> -d <sub>3</sub>   | +         | 575.3                        | <b>301.1</b>               | 50                | -20             | 21 | -20             |
|                                   |           |                              | 283.1                      | 50                | -20             | 30 | -30             |
| DHVD <sub>3</sub> -d <sub>3</sub> | +         | 577.3                        | <b>317.1</b>               | 50                | -20             | 22 | -22             |
|                                   |           |                              | 299.1                      | 50                | -20             | 30 | -20             |

The product ions in **bold** were used for quantification.

**Table S2.** PTAD derivatization efficiency of 7 VDs in standard solution, human serum, mouse liver, and cell extract.

| <b>Analytes</b>   | <b>Derivatization efficiency (%)</b> |                      |                      |                     |
|-------------------|--------------------------------------|----------------------|----------------------|---------------------|
|                   | <b>Standard solution</b>             | <b>Serum extract</b> | <b>Liver extract</b> | <b>Cell extract</b> |
| VD <sub>3</sub>   | 99.7                                 | 98.1                 | 92.1                 | 88.9                |
| VD <sub>2</sub>   | 99.0                                 | 110.8                | 72.3                 | 95.6                |
| HVD <sub>3</sub>  | 97.0                                 | 94.4                 | 85.6                 | 103.1               |
| HVD <sub>2</sub>  | 99.7                                 | 86.3                 | 75.3                 | 88.6                |
| DHVD <sub>3</sub> | 92.5                                 | 79.6                 | 111.2                | 90.3                |
| DHVD <sub>2</sub> | 97.0                                 | 103.1                | 94.4                 | 84.7                |
| THVD <sub>3</sub> | 96.0                                 | 86.0                 | 70.6                 | 106.8               |

**Table S3.** LODs, LOQs, linear dynamic range and regression curve of PTAD-derived VDs.

| Analytes          | LODs<br>(pg mL <sup>-1</sup> ) | LOQs<br>(pg mL <sup>-1</sup> ) | Linear dynamic<br>range (ng mL <sup>-1</sup> ) | Regression line |           |                |
|-------------------|--------------------------------|--------------------------------|------------------------------------------------|-----------------|-----------|----------------|
|                   |                                |                                |                                                | Slope           | Intercept | R <sup>2</sup> |
| VD <sub>3</sub>   | 3                              | 10                             | 0.05-50                                        | 0.23            | 0.10      | 0.9963         |
| VD <sub>2</sub>   | 3                              | 10                             | 0.05-50                                        | 0.23            | 0.19      | 0.9936         |
| HVD <sub>3</sub>  | 10                             | 30                             | 0.10-100                                       | 0.25            | 0.22      | 0.9962         |
| HVD <sub>2</sub>  | 7                              | 20                             | 0.10-100                                       | 0.29            | 0.33      | 0.9968         |
| DHVD <sub>3</sub> | 13                             | 40                             | 0.10-100                                       | 0.31            | 0.35      | 0.9943         |
| DHVD <sub>2</sub> | 10                             | 30                             | 0.10-100                                       | 0.07            | 0.08      | 0.9933         |
| THVD <sub>3</sub> | 20                             | 70                             | 0.20-200                                       | 0.12            | 0.23      | 0.9966         |



**Table S4.** Precisions (intra- and inter-day) and recoveries for analysis of PTAD-derived VDs in three different concentrations (0.2, 2, and 50 ng mL<sup>-1</sup>).

| Analytes          | Intra-day precision<br>(RSD, %; n = 5) |        |      | Inter-day precision<br>(RSD, %; n = 3) |        |      | Recoveries<br>(%; n = 3) |        |       |
|-------------------|----------------------------------------|--------|------|----------------------------------------|--------|------|--------------------------|--------|-------|
|                   | Low                                    | Medium | High | Low                                    | Medium | High | Low                      | Medium | High  |
| VD <sub>3</sub>   | 14.2                                   | 7.6    | 5.8  | 9.7                                    | 7.3    | 6.1  | 79.1                     | 89.8   | 97.6  |
| VD <sub>2</sub>   | 12.1                                   | 6.3    | 3.4  | 14.5                                   | 6.8    | 5.8  | 87.9                     | 98.4   | 102.3 |
| HVD <sub>3</sub>  | 7.5                                    | 7.5    | 4.4  | 16.5                                   | 9.2    | 7.9  | 78.8                     | 93.6   | 110.2 |
| HVD <sub>2</sub>  | 9.7                                    | 6.1    | 3.7  | 15.6                                   | 8.4    | 5.5  | 108.4                    | 89.2   | 92.1  |
| DHVD <sub>3</sub> | 15.5                                   | 5.7    | 3.5  | 10.4                                   | 8.7    | 6.2  | 92.5                     | 85.6   | 96.8  |
| DHVD <sub>2</sub> | 7.4                                    | 7.3    | 3.2  | 14.9                                   | 9.7    | 5.7  | 84.7                     | 103.1  | 102.2 |
| THVD <sub>3</sub> | 8.4                                    | 8.3    | 4.5  | 9.2                                    | 7.6    | 7.1  | 85.7                     | 100.5  | 100.2 |

**Table S5.** Extraction efficiency and matrix effect for VDs from human serum, mouse liver, and MLF cell using our established method.

| Analytes          | Extraction efficiency (%) |       |       | Matrix effect (%) |       |       |
|-------------------|---------------------------|-------|-------|-------------------|-------|-------|
|                   | Serum                     | Liver | Cell  | Serum             | Liver | Cell  |
| VD <sub>3</sub>   | 81.3                      | 87.5  | 88.4  | 81.3              | 108.2 | 91.3  |
| VD <sub>2</sub>   | 86.9                      | 86.0  | 86.3  | 86.9              | 75.2  | 106.9 |
| HVD <sub>3</sub>  | 100.3                     | 70.4  | 85.9  | 100.3             | 98.6  | 103.8 |
| HVD <sub>2</sub>  | 75.5                      | 75.9  | 86.2  | 75.5              | 82.6  | 75.7  |
| DHVD <sub>3</sub> | 79.0                      | 80.8  | 87.2  | 79.0              | 79.9  | 119.1 |
| DHVD <sub>2</sub> | 98.8                      | 92.8  | 104.9 | 98.8              | 77.8  | 98.8  |
| THVD <sub>3</sub> | 83.9                      | 89.6  | 83.5  | 73.9              | 83.0  | 83.9  |
